# Supplementary material for: Genetic developmental timing revealed by inter-species transplantations in fish
Source: Oxford University Press journal article supplement (doi:10.1242/dev.192500), 2020-01-01
Supplement: dev192500supp.pdf [file dev192500supp.pdf]

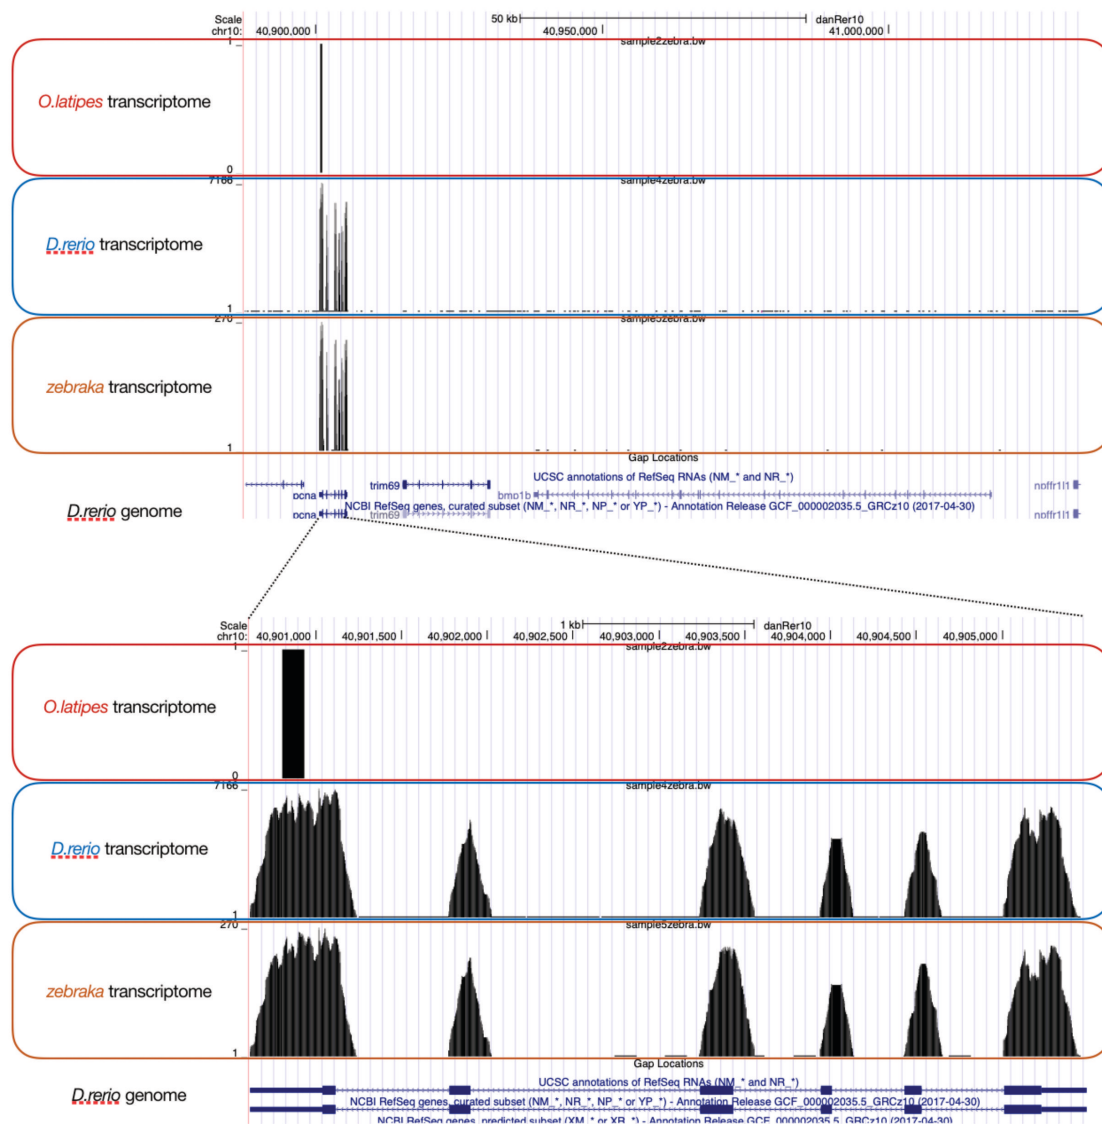

**Figure S1. Transcriptomes of medaka, zebrafish and zebrafish plotted on the zebrafish genome**

(A, Top) Transcriptomes from medaka are in the upper compartment, from zebrafish in the middle and from zebrafish at the bottom. The image shows an example of a peak obtained using the medaka transcriptome. (A, Bottom) A detail of the region shows a different morphology for the medaka peak, different from the zebrafish or zebrafish peaks that span along the entire set of exons of PCNA. Also note that the medaka peak consist of just one read, different from the >7K in zebrafish or >250 in zebrafish.

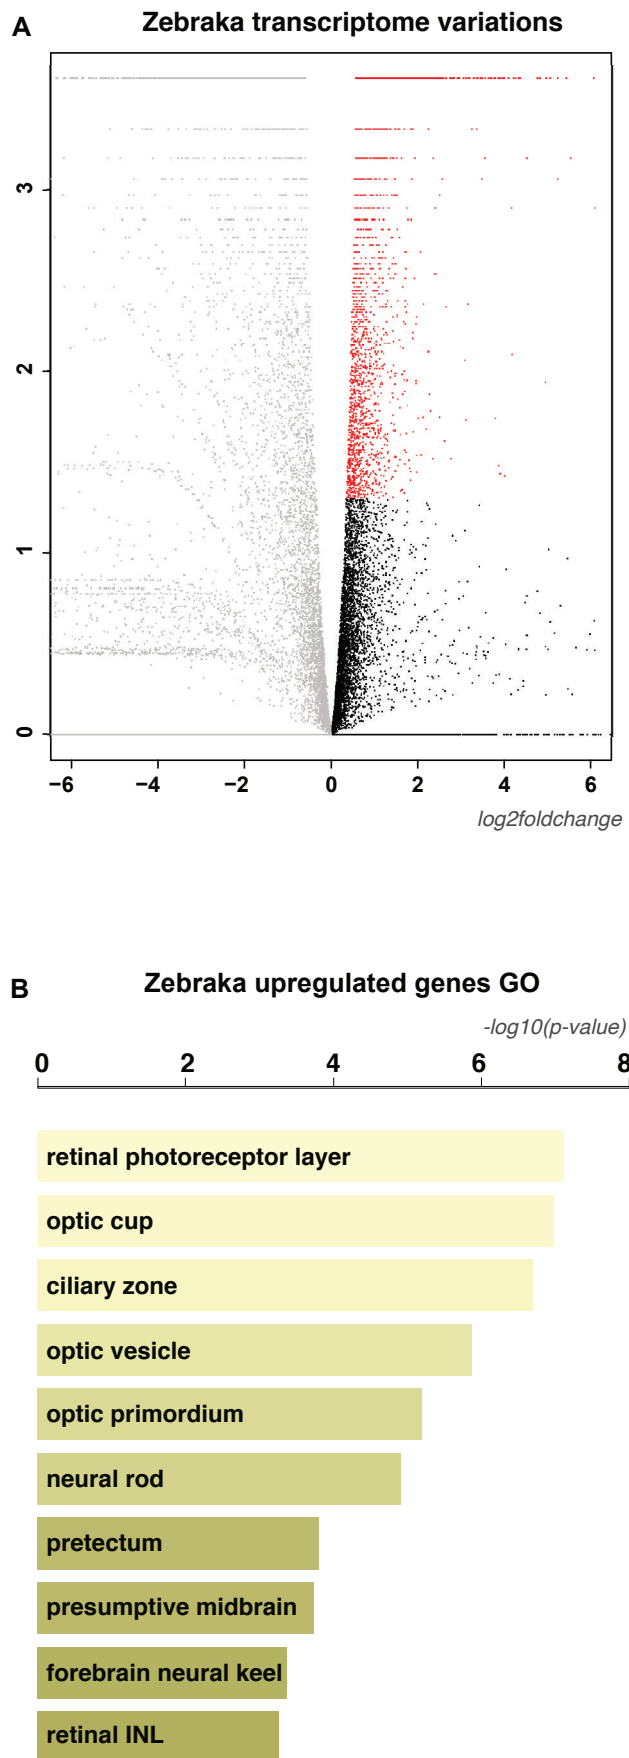

**Figure S2. ZebraKa transcriptomic landscape at 48 hpf.**

(A) Volcano plot illustrating the up-regulated genes in the zebraKa cells if compared with the zebrafish WT transcriptome. Each dot corresponds to a gene. Black dots indicate not significant variations; whereas red dots correspond to genes significantly up-regulated in the zebraKa cells (2434 genes). Grey dots indicate zebraKa down-regulated genes. (B) GO terms enriched in the zebraKa up-regulated genes ordered by significance.

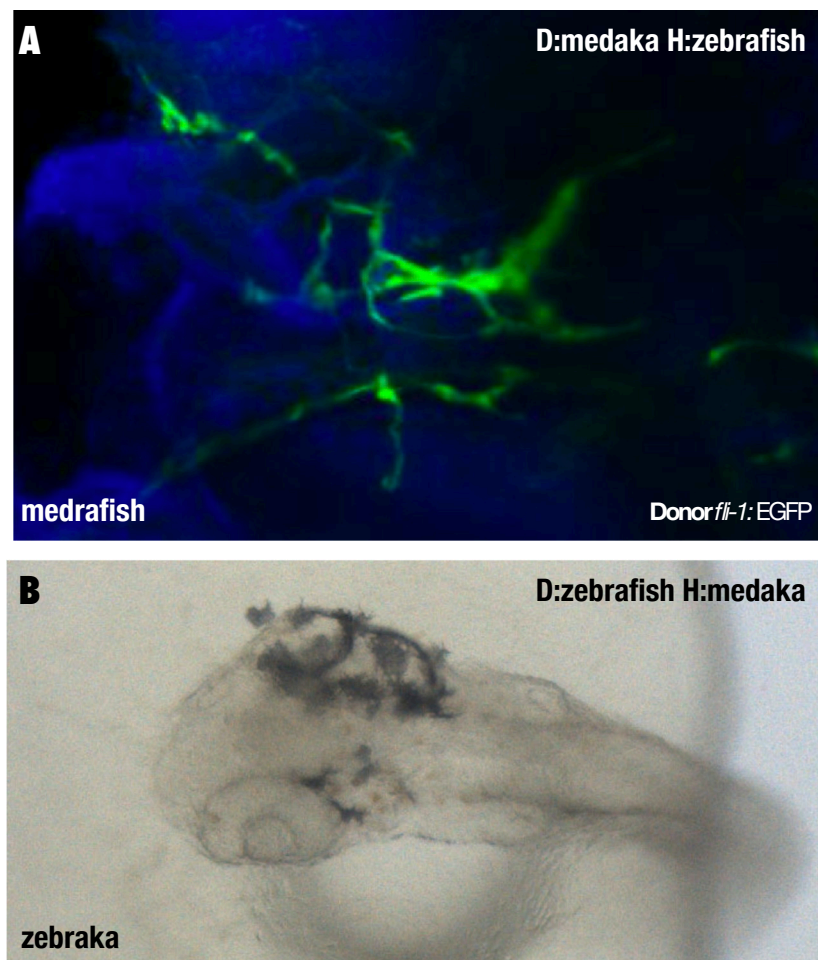

**Figure S3. Differentiation of donor cells in inter-species transplantations.**

(A) Confocal image of 3 dpf medafish using a Tg(*fli1*:EGFP) medaka donor. (B) Binocular picture of a 2.5 dpf zebraka using a pigmented zebrafish donor and a wild type medaka host.

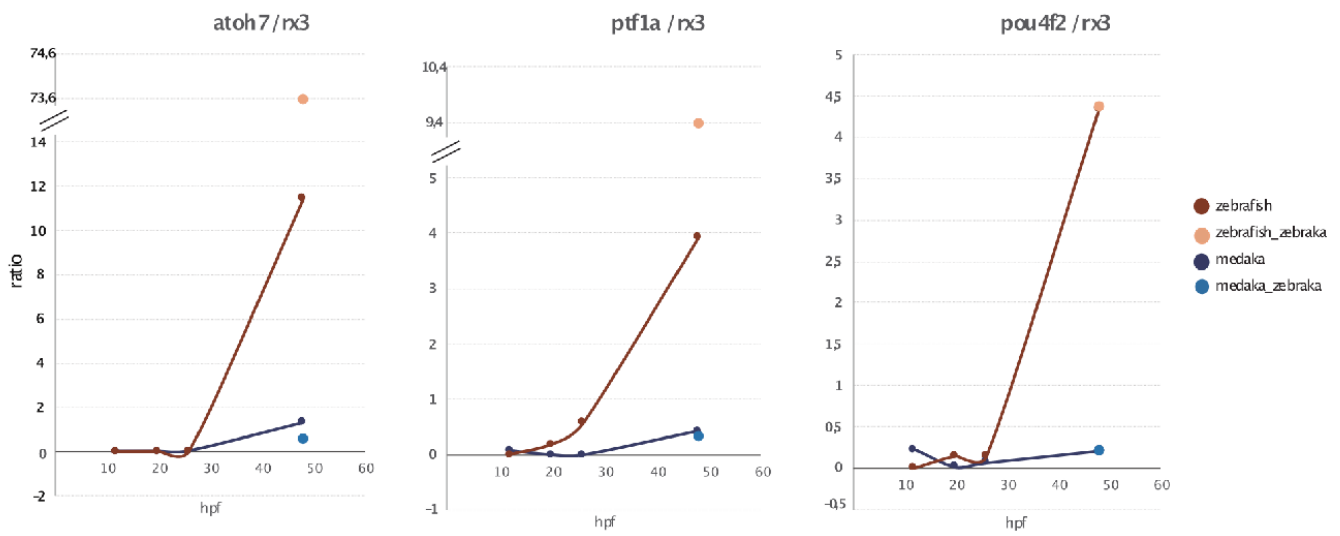

**Figure S4. Ratios of progenitor / differentiation retinal genes in zebrakas.**

Plots show lines for the specified ratio during early embryonic development in zebrafish and medaka. The dots at 50hpf correspond to samples used in this study.

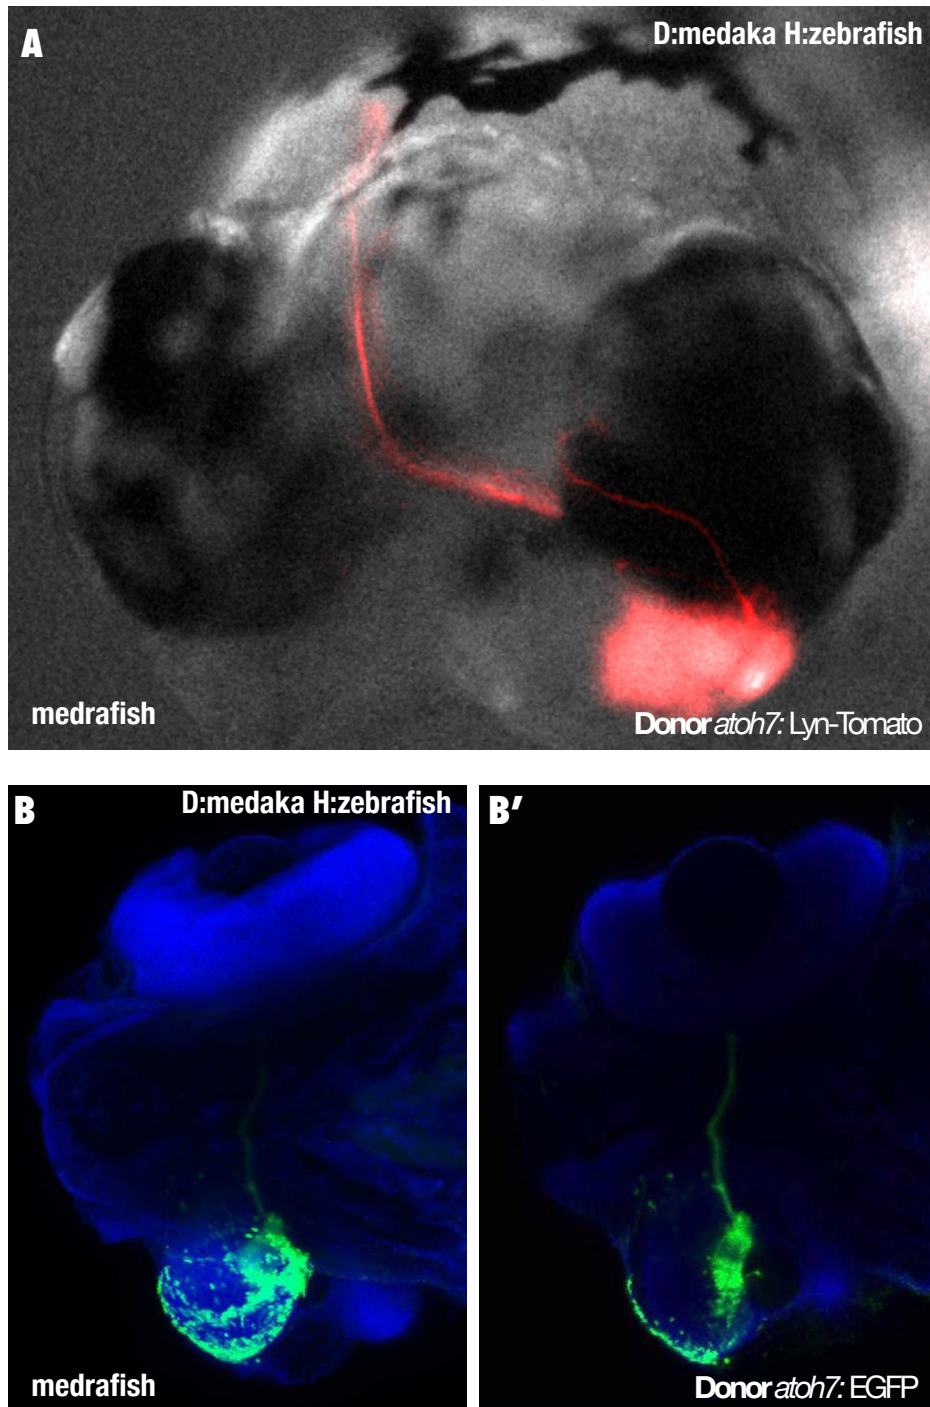

**Figure S5. Differentiation of RGCs is an ectopic medrafish retina.**

(A, B) Confocal images of a 4 dpf medrafish using Tg(*atoh7*:LynTomato) (A) or Tg(*atoh7*:EGFP) (B) medaka as a donor and a non-transgenic zebrafish host. RGCs differentiate in the ectopic retina and form an optic nerve that projects to the host tectum. (A) Frontal view showing that axons of medaka RGCs travel to the contralateral host tectum. (B) Confocal section on medrafish ectopic retina showing EGFP+ cells (presumably RGCs). Deeper planes (B') show a proper organization of RGCs in the most inner layer (ganglion cell layer).

| D: <i>D.r. OIβactin2:EGFP</i> | Survival | Cluster formation | Ectopic retina | Notes |
|-------------------------------|----------|-------------------|----------------|-------|
| H: <i>O.I, Cab</i>            |          |                   |                |       |
| zebraka 1                     | Y        | Y                 | Y              |       |
| zebraka 2                     | N        |                   |                |       |
| zebraka 3                     | Y        | Y                 | Y              |       |
| zebraka 4                     | Y        | Y                 | Y              |       |
| zebraka 5                     | Y        | Y                 | Y              |       |
| zebraka 6                     | Y        | Y                 | Y              |       |
| zebraka 7                     | Y        | Y                 | Y              |       |

  

| D: <i>D.r. OIβactin2:EGFP</i> | Survival | Cluster formation | Ectopic retina | Notes    |
|-------------------------------|----------|-------------------|----------------|----------|
| H: <i>O.I, LoxPOUT</i>        |          |                   |                |          |
| zebraka 8                     | N        |                   |                |          |
| zebraka 9                     | N        |                   |                |          |
| zebraka 10                    | N        |                   |                |          |
| zebraka 11                    | Y        | N                 | N              | No GFP + |

  

| D: <i>D.r. OIβactin2:EGFP</i>       | Survival | Cluster formation | Ectopic retina | Notes    |
|-------------------------------------|----------|-------------------|----------------|----------|
| H: <i>O.I, GaudiRSG, cmlc2:ECFP</i> |          |                   |                |          |
| zebraka 12                          | Y        | Y                 | Y              |          |
| zebraka 13                          | N        |                   |                |          |
| zebraka 14                          | Y        | Y                 | Y              |          |
| zebraka 15                          | Y        | Y                 | Y              |          |
| zebraka 16                          | Y        | N                 | N              | No GFP + |
| zebraka 17                          | Y        | N                 | N              | No GFP + |

  

| D: <i>D.r. OIβactin2:EGFP</i>    | Survival | Cluster formation | Ectopic retina | Notes |
|----------------------------------|----------|-------------------|----------------|-------|
| H: <i>O.I, atoh7:lyntdTomato</i> |          |                   |                |       |
| zebraka 18                       | Y        | Y                 | Y              |       |
| zebraka 19                       | N        |                   |                |       |
| zebraka 20                       | Y        | Y                 | Y              |       |
| zebraka 21                       | Y        | Y                 | N/A            |       |
| zebraka 22                       | N        |                   |                |       |
| zebraka 23                       | N        |                   |                |       |
| zebraka 24                       | Y        | Y                 | Y              |       |
| zebraka 25                       | N        |                   |                |       |

  

| D: <i>D.r. atoh7:GFP, ef1:lynTomato</i> | Survival | Cluster formation | Ectopic retina | Notes |
|-----------------------------------------|----------|-------------------|----------------|-------|
| H: <i>O.I, atoh7:lyntdTomato</i>        |          |                   |                |       |
| zebraka 26                              | Y        | Y                 | Y              |       |

  

| D: <i>D.r. atoh7:GFP, ef1:lynTomato</i> | Survival | Cluster formation | Ectopic retina | Notes |
|-----------------------------------------|----------|-------------------|----------------|-------|
| H: <i>O.I, Cab</i>                      |          |                   |                |       |
| zebraka 27                              | Y        | Y                 | Y              |       |
| zebraka 28                              | Y        | Y                 | Y              |       |
| zebraka 29                              | Y        | Y                 | Y              |       |

  

| D: <i>D.r. OIβactin2:lyntdTomato</i> | Survival | Cluster formation | Ectopic retina | Notes    |
|--------------------------------------|----------|-------------------|----------------|----------|
| H: <i>O.I, atoh7:EGFP</i>            |          |                   |                |          |
| zebraka 30                           | Y        | N/A               | N/A            | No Red + |

**Table S1. Zebbraka transplantation experiments**

List of transplantation experiments using zebrafish donor blastomeres to transplant into medaka blastulae. Genotypes of donor and hosts are indicated; each experiment is a different transplantation day (zebraka 1, zebraka 2, etc). Black cells represent cases in which no embryo survive beyond day 1; Y/N stands for Yes/No; N/A represents cases in which cluster formation or ectopic retina could not be assessed due to the lack of the reporter protein (typically, heterozygote donors)

| D: <i>O.l.</i> <b>LoxPout</b> | Survival | Cluster formation | Ectopic retina | Notes |
|-------------------------------|----------|-------------------|----------------|-------|
| H: <i>D.r.</i> WIK/AB         |          |                   |                |       |
| medrafish 1                   | Y        | Y                 | Y              |       |
| medrafish 2                   | Y        | Y                 | N              |       |
| medrafish 3                   | Y        | Y                 | Y              |       |
| medrafish 4                   | Y        | Y                 | Y              |       |
| medrafish 5                   | Y        | Y                 | N              |       |
| medrafish 6                   | Y        | Y                 | N/A            |       |
| medrafish 7                   | Y        | Y                 | Y              |       |
| medrafish 8                   | Y        | Y                 | Y              |       |
| medrafish 9                   | Y        | Y                 | Y              |       |
| medrafish 10                  | Y        | Y                 | Y              |       |
| medrafish 11                  | Y        | Y                 | Y              |       |
| medrafish 12                  | Y        | Y                 | Y              |       |
| medrafish 13                  | Y        | Y                 | Y              |       |

  

| D: <i>O.l.</i> <b>wimbledon</b> | Survival | Cluster formation | Ectopic retina | Notes |
|---------------------------------|----------|-------------------|----------------|-------|
| H: <i>D.r.</i> WIK/AB           |          |                   |                |       |
| medrafish 14                    | Y        | Y                 | Y              |       |

  

| D: <i>O.l.</i> <b>fl/1:EGFP, rx2:H2B-mRFP</b> | Survival | Cluster formation | Ectopic retina | Notes    |
|-----------------------------------------------|----------|-------------------|----------------|----------|
| H: <i>D.r.</i> WIK/AB                         |          |                   |                |          |
| medrafish 15                                  | Y        | Y                 | Y              |          |
| medrafish 16                                  | Y        | Y                 | Y              |          |
| medrafish 17                                  | Y        | Y                 | Y              |          |
| medrafish 18                                  | Y        | Y                 | N/A            |          |
| medrafish 19                                  | Y        | Y                 | Y              |          |
| medrafish 20                                  | Y        | N/A               | N/A            | No RFP + |
| medrafish 21                                  | Y        | N/A               | N/A            | No RFP + |
| medrafish 22                                  | Y        | N/A               | N/A            | No RFP + |

  

| D: <i>O.l.</i> <b>atoh7:EGFP</b> | Survival | Cluster formation | Ectopic retina | Notes |
|----------------------------------|----------|-------------------|----------------|-------|
| H: <i>D.r.</i> WIK/AB            |          |                   |                |       |
| medrafish 23                     | Y        | Y                 | Y              |       |
| medrafish 24                     | Y        | Y                 | Y              |       |
| medrafish 25                     | Y        | Y                 | Y              |       |
| medrafish 26                     | Y        | Y                 | Y              |       |
| medrafish 27                     | Y        | Y                 | Y              |       |
| medrafish 28                     | Y        | Y                 | Y              |       |
| medrafish 29                     | Y        | Y                 | Y              |       |
| medrafish 30                     | Y        | Y                 | Y              |       |
| medrafish 31                     | Y        | Y                 | Y              |       |

  

| D: <i>O.l.</i> <b>atoh7:lyntdTomato</b> | Survival | Cluster formation | Ectopic retina | Notes    |
|-----------------------------------------|----------|-------------------|----------------|----------|
| H: <i>D.r.</i> WIK/AB                   |          |                   |                |          |
| medrafish 32                            | Y        | N/A               | N/A            | No Red + |
| medrafish 33                            | Y        | Y                 | Y              |          |
| medrafish 34                            | Y        | Y                 | Y              |          |
| medrafish 35                            | Y        | Y                 | Y              |          |
| medrafish 36                            | Y        | Y                 | Y              |          |
| medrafish 37                            | N        |                   |                |          |
| medrafish 38                            | Y        | Y                 | Y              |          |

**Table S2. Medrafish transplantation experiments**

List of transplantation experiments using medaka donor blastomeres to transplant into zebrafish blastulae. Genotypes of donor and hosts are indicated; each experiment is a different transplantation day (medrafish 1, medrafish 2, *etc*). Black cells represent cases in which no embryo survive beyond day 1; Y/N stands for Yes/No; N/A represents cases in which cluster formation or ectopic retina could not be assessed due to the lack of the reporter protein (typically, heterozygote donors)

| <i>sample</i> | <i>species</i> | alignment vs <i>OryLat2</i> |                       |                        | alignment vs <i>danRer10</i> |                       |                        |
|---------------|----------------|-----------------------------|-----------------------|------------------------|------------------------------|-----------------------|------------------------|
|               |                | <i>n reads tot</i>          | %<br><i>alignment</i> | <i>n reads aligned</i> | <i>n reads tot</i>           | %<br><i>alignment</i> | <i>n reads aligned</i> |
| 1             | medaka         | 52712186                    | 92,65 %               | 48837840,3             | 52712186                     | 0,58 %                | 305730,679             |
| 2             | medaka         | 47861284                    | 88,28 %               | 42251941,5             | 47861284                     | 0,52 %                | 248878,677             |
| 3             | zebrafish      | 65650278                    | 0,42 %                | 275731,168             | 65650278                     | 90,45 %               | 59380676,5             |
| 4             | zebrafish      | 93625821                    | 0,37 %                | 346415,538             | 93625821                     | 92,20 %               | 86323007               |
| 5             | zebraka        | 83057736                    | 88,08 %               | 73157253,9             | 83057736                     | 2,24 %                | 1860493,29             |
| 6             | zebraka        | 65423949                    | 90,39 %               | 59136707,5             | 65423949                     | 2,21 %                | 1445869,27             |
| 7             | zebraka        | 73869239                    | 88,06 %               | 65049251,9             | 73869239                     | 2,24 %                | 1654670,95             |

**Table S3. Number of reads and alignment of transcriptomes to medaka and zebrafish genomes**

Alignments of medaka, zebrafish and zebraka full transcriptomes to the genomes of medaka (version *OryLat2*) and zebrafish (version *danRer10*). Alignments are shown for each single transcriptome.



| Organ        | tracking_id        | gene_short_name | medaka   | zebrafish | zebraka  |
|--------------|--------------------|-----------------|----------|-----------|----------|
| eye          | ENSDARG00000002445 | prdm1a          | 0        | 5,65089   | 4,94264  |
|              | ENSDARG00000003732 | mitfa           | 0        | 5,50327   | 0,746289 |
|              | ENSDARG00000005574 | vsx2            | 0        | 21,43285  | 103,344  |
|              | ENSDARG00000007480 | rpe65a          | 0        | 2,077465  | 0        |
|              | ENSDARG00000014479 | ptf1a           | 0        | 5,30958   | 21,0451  |
|              | ENSDARG00000039077 | tyr             | 0        | 5,09426   | 2,16854  |
|              | ENSDARG00000040321 | rx2             | 0        | 5,374545  | 21,0656  |
|              | ENSDARG00000052893 | rx3             | 0        | 2,708445  | 2,24017  |
|              | ENSDARG00000054420 | rpe65c          | 0        | 4,768605  | 0,741695 |
|              | ENSDARG00000056292 | vsx1            | 0        | 6,713195  | 87,2205  |
|              | ENSDARG00000069552 | atoh7           | 0        | 10,729815 | 164,963  |
|              | ENSDARG00000069737 | pou4f2          | 0        | 2,10973   | 9,8081   |
|              | ENSDARG00000071684 | rx1             | 0        | 9,31434   | 43,2672  |
|              | ENSDARG00000094752 | rpe65b          | 0        | 27,16545  | 0,310149 |
|              | ENSDARG00000103379 | pax6a           | 0        | 37,95835  | 284,621  |
|              | ENSDARG00000102047 | mab21l1         | 0,803865 | 42,9119   | 136,364  |
|              | ENSDARG00000098925 | prdm1b          | 0        | 5,21996   | 121,93   |
|              | ENSDARG00000019335 | hes6            | 0        | 86,2615   | 194,179  |
|              | ENSDARG00000011235 | otx2            | 0        | 20,428    | 152,552  |
|              | ENSDARG00000011989 | crx             | 0        | 1,44177   | 41,3936  |
| heart/muscle | ENSDARG00000032976 | cmlc1           | 0        | 32,5024   | 0        |
|              | ENSDARG00000042018 | fhl2a           | 0        | 6,662425  | 0        |
|              | ENSDARG00000098952 | gata4           | 0        | 1,96555   | 0        |
|              | ENSDARG00000103589 | gata6           | 0        | 14,02775  | 0        |
|              | ENSDARG00000037995 | gdf3            | 0        | 0,612672  | 0        |
|              | ENSDARG00000099974 | ldb3b           | 0        | 103,601   | 0        |
|              | ENSDARG00000035322 | myh7bb          | 0        | 6,0762    | 0        |
|              | ENSDARG00000057317 | nexn            | 0        | 27,1057   | 0        |
|              | ENSDARG00000005841 | tnni2a.2        | 0        | 6,567225  | 0        |
|              | ENSDARG00000011400 | tnnc1a          | 0        | 7,840665  | 0        |
|              | ENSDARG00000020610 | tnnt2a          | 0        | 21,735    | 0        |
|              | ENSDARG00000029069 | tnni2a.4        | 0        | 1569,055  | 0        |
|              | ENSDARG00000029995 | tnni2b.2        | 0        | 19,1463   | 0        |
|              | ENSDARG00000035958 | tnni2b.1        | 0        | 177,3585  | 0        |
|              | ENSDARG00000036671 | tnni1a1         | 0        | 93,67895  | 0        |
|              | ENSDARG00000042559 | tnni1c          | 0        | 55,94625  | 0        |
|              | ENSDARG00000052708 | tnni1b          | 0        | 17,72405  | 0        |
|              | ENSDARG00000002589 | mylpfb          | 0        | 1381      | 0        |
|              | ENSDARG00000005629 | smyd2b          | 0        | 20,64005  | 0        |
|              | ENSDARG00000007277 | myf5            | 0        | 5,70612   | 0        |
|              | ENSDARG00000009133 | myo1eb          | 0        | 11,5902   | 0        |
|              | ENSDARG00000011615 | mybpc3          | 0        | 55,03795  | 0        |
|              | ENSDARG00000019096 | myl7            | 0        | 30,3915   | 0        |
|              | ENSDARG00000021265 | mybpc2b         | 0        | 54,02825  | 0        |
|              | ENSDARG00000061249 | myom1a          | 0        | 58,81685  | 0        |
|              | ENSDARG00000062592 | myl10           | 0        | 618,9045  | 0        |
|              | ENSDARG00000075433 | myom2a          | 0        | 46,72825  | 0        |
|              | ENSDARG00000091099 | myom2b          | 0        | 21,4495   | 0        |
|              | ENSDARG00000091253 | smyd1b          | 0        | 24,88595  | 0        |
|              | ENSDARG00000099959 | smyhc1          | 0,337096 | 168,427   | 0        |

**Table S4. Transcriptional profile of ectopic cluster in zebrakas**

List of zebrafish transcripts (and their ID) corresponding to retina genes (upper section) and heart genes (bottom section). The different columns show the count number of their respective sequences in transcriptomes from medaka, zebrafish and zebraka.
